# Supplementary material for: Long-term colorectal cancer incidence after adenoma removal and the effects of surveillance on incidence: a multicentre, retrospective, cohort study
Source: PubMed Central journal article supplement (PMC7456728; doi:10.1136/gutjnl-2019-320036), 2020-01-17
Supplement: gutjnl-2019-320036supp001.pdf [file gutjnl-2019-320036supp001.pdf]

Supplementary Table 1: Baseline patient, procedural, and polyp characteristics by surveillance visit attendance

|                             | Low-risk group (n=14 401)            |                               |         | Intermediate-risk group (n=11 852)   |                               |         | High-risk group (n=2719)             |                               |         |
|-----------------------------|--------------------------------------|-------------------------------|---------|--------------------------------------|-------------------------------|---------|--------------------------------------|-------------------------------|---------|
|                             | Patients with ≥1 surveillance visits | Patients with no surveillance | p-value | Patients with ≥1 surveillance visits | Patients with no surveillance | p-value | Patients with ≥1 surveillance visits | Patients with no surveillance | p-value |
|                             | n (%)                                | n (%)                         |         | n (%)                                | n (%)                         |         | n (%)                                | n (%)                         |         |
| Total                       | 7194 (50.0)                          | 7207 (50.0)                   | ..      | 7169 (60.5)                          | 4683 (39.5)                   | ..      | 1808 (66.5)                          | 911 (33.5)                    | ..      |
| Sex                         | ..                                   | ..                            | 0.32    | ..                                   | ..                            | 0.023   | ..                                   | ..                            | 0.46    |
| Women                       | 3218 (44.7)                          | 3164 (43.9)                   | ..      | 3128 (43.6)                          | 2143 (45.8)                   | ..      | 523 (28.9)                           | 276 (30.3)                    | ..      |
| Men                         | 3976 (55.3)                          | 4043 (56.1)                   | ..      | 4041 (56.4)                          | 2540 (54.2)                   | ..      | 1285 (71.1)                          | 635 (69.7)                    | ..      |
| Age, years                  | ..                                   | ..                            | <0.0001 | ..                                   | ..                            | <0.0001 | ..                                   | ..                            | <0.0001 |
| <55                         | 2147 (29.8)                          | 1422 (19.7)                   | ..      | 1537 (21.4)                          | 560 (12.0)                    | ..      | 221 (12.2)                           | 62 (6.8)                      | ..      |
| 55-64                       | 2339 (32.5)                          | 1652 (22.9)                   | ..      | 2278 (31.8)                          | 880 (18.8)                    | ..      | 602 (33.3)                           | 148 (16.2)                    | ..      |
| 65-74                       | 2007 (27.9)                          | 2251 (31.2)                   | ..      | 2460 (34.3)                          | 1455 (31.1)                   | ..      | 719 (39.8)                           | 346 (38.0)                    | ..      |
| ≥75                         | 701 (9.7)                            | 1882 (26.1)                   | ..      | 894 (12.5)                           | 1788 (38.2)                   | ..      | 266 (14.7)                           | 355 (39.0)                    | ..      |
| Number of adenomas          | ..                                   | ..                            | <0.0001 | ..                                   | ..                            | 0.041   | ..                                   | ..                            | 0.0015  |
| 1                           | 5753 (80.0)                          | 6009 (83.4)                   | ..      | 4701 (65.6)                          | 3092 (66.0)                   | ..      | 0 (0)                                | 0 (0)                         | ..      |
| 2                           | 1441 (20.0)                          | 1198 (16.6)                   | ..      | 1863 (26.0)                          | 1190 (25.4)                   | ..      | 0 (0)                                | 0 (0)                         | ..      |
| 3                           | 0 (0)                                | 0 (0)                         | ..      | 416 (5.8)                            | 308 (6.6)                     | ..      | 788 (43.6)                           | 439 (48.2)                    | ..      |
| 4                           | 0 (0)                                | 0 (0)                         | ..      | 189 (2.6)                            | 93 (2.0)                      | ..      | 367 (20.3)                           | 190 (20.9)                    | ..      |
| 5                           | 0 (0)                                | 0 (0)                         | ..      | 0 (0)                                | 0 (0)                         | ..      | 297 (16.4)                           | 157 (17.2)                    | ..      |
| ≥6                          | 0 (0)                                | 0 (0)                         | ..      | 0 (0)                                | 0 (0)                         | ..      | 356 (19.7)                           | 125 (13.7)                    | ..      |
| Adenoma size, mm†           | ..                                   | ..                            | ..      | ..                                   | ..                            | 0.0003  | ..                                   | ..                            | 0.13    |
| <10                         | 7194 (100)                           | 7207 (100)                    | ..      | 605 (8.4)                            | 401 (8.6)                     | ..      | 189 (10.5)                           | 75 (8.2)                      | ..      |
| 10-19                       | 0 (0)                                | 0 (0)                         | ..      | 4018 (56.0)                          | 2784 (59.4)                   | ..      | 870 (48.1)                           | 474 (52.0)                    | ..      |
| ≥20                         | 0 (0)                                | 0 (0)                         | ..      | 2546 (35.5)                          | 1498 (32.0)                   | ..      | 732 (40.5)                           | 352 (38.6)                    | ..      |
| Unknown                     | 0 (0)                                | 0 (0)                         | ..      | 0 (0)                                | 0 (0)                         | ..      | 17 (0.9)                             | 10 (1.1)                      | ..      |
| Adenoma histology‡          | ..                                   | ..                            | <0.0001 | ..                                   | ..                            | 0.0007  | ..                                   | ..                            | 0.95    |
| Tubular                     | 5430 (75.5)                          | 5708 (79.2)                   | ..      | 2762 (38.5)                          | 1932 (41.3)                   | ..      | 684 (37.8)                           | 354 (38.9)                    | ..      |
| Tubulovillous               | 1149 (16.0)                          | 964 (13.4)                    | ..      | 3395 (47.4)                          | 2142 (45.7)                   | ..      | 867 (48.0)                           | 426 (46.8)                    | ..      |
| Villous                     | 106 (1.5)                            | 84 (1.2)                      | ..      | 683 (9.5)                            | 451 (9.6)                     | ..      | 217 (12.0)                           | 111 (12.2)                    | ..      |
| Unknown                     | 509 (7.1)                            | 451 (6.3)                     | ..      | 329 (4.6)                            | 158 (3.4)                     | ..      | 40 (2.2)                             | 20 (2.2)                      | ..      |
| Adenoma dysplasia‡          | ..                                   | ..                            | <0.0001 | ..                                   | ..                            | <0.0001 | ..                                   | ..                            | 0.43    |
| Low-grade                   | 6507 (90.5)                          | 6735 (93.5)                   | ..      | 5596 (78.1)                          | 3803 (81.2)                   | ..      | 1340 (74.1)                          | 695 (76.3)                    | ..      |
| High-grade                  | 224 (3.1)                            | 133 (1.8)                     | ..      | 1236 (17.2)                          | 743 (15.9)                    | ..      | 420 (23.2)                           | 196 (21.5)                    | ..      |
| Unknown                     | 463 (6.4)                            | 339 (4.7)                     | ..      | 337 (4.7)                            | 137 (2.9)                     | ..      | 48 (2.7)                             | 20 (2.2)                      | ..      |
| Proximal polyps             | ..                                   | ..                            | 0.065   | ..                                   | ..                            | 0.34    | ..                                   | ..                            | 0.35    |
| No                          | 4008 (55.7)                          | 4125 (57.2)                   | ..      | 5016 (70.0)                          | 3238 (69.1)                   | ..      | 431 (23.8)                           | 232 (25.5)                    | ..      |
| Yes                         | 3186 (44.3)                          | 3082 (42.8)                   | ..      | 2153 (30.0)                          | 1445 (30.9)                   | ..      | 1377 (76.2)                          | 679 (74.5)                    | ..      |
| Completeness of colonoscopy | ..                                   | ..                            | <0.0001 | ..                                   | ..                            | <0.0001 | ..                                   | ..                            | <0.0001 |
| Complete                    | 5570 (77.4)                          | 6149 (85.3)                   | ..      | 5362 (74.8)                          | 3605 (77.0)                   | ..      | 1574 (87.1)                          | 780 (85.6)                    | ..      |
| Incomplete                  | 481 (6.7)                            | 659 (9.1)                     | ..      | 605 (8.4)                            | 716 (15.3)                    | ..      | 56 (3.1)                             | 67 (7.4)                      | ..      |
| Unknown                     | 1143 (15.9)                          | 399 (5.5)                     | ..      | 1202 (16.8)                          | 362 (7.7)                     | ..      | 178 (9.8)                            | 64 (7.0)                      | ..      |
| Bowel preparation quality   | ..                                   | ..                            | <0.0001 | ..                                   | ..                            | <0.0001 | ..                                   | ..                            | <0.0001 |

|                                      |                   |             |             |         |             |             |    |             |            |         |
|--------------------------------------|-------------------|-------------|-------------|---------|-------------|-------------|----|-------------|------------|---------|
|                                      | Excellent or good | 2562 (35.6) | 2583 (35.8) | ..      | 2392 (33.4) | 1582 (33.8) | .. | 768 (42.5)  | 351 (38.5) | ..      |
|                                      | Satisfactory      | 1122 (15.6) | 1418 (19.7) | ..      | 995 (13.9)  | 908 (19.4)  | .. | 246 (13.6)  | 165 (18.1) | ..      |
|                                      | Poor              | 388 (5.4)   | 580 (8.0)   | ..      | 280 (3.9)   | 380 (8.1)   | .. | 74 (4.1)    | 69 (7.6)   | ..      |
|                                      | Unknown           | 3122 (43.4) | 2626 (36.4) | ..      | 3502 (48.8) | 1813 (38.7) | .. | 720 (39.8)  | 326 (35.8) | ..      |
| Year of baseline visit               | ..                | ..          | ..          | <0.0001 | ..          | ..          | .. | ..          | ..         | 0.021   |
|                                      | 1984-1999         | 1126 (15.7) | 514 (7.1)   | ..      | 1335 (18.6) | 535 (11.4)  | .. | 241 (13.3)  | 88 (9.7)   | ..      |
|                                      | 2000-2004         | 2855 (39.7) | 2313 (32.1) | ..      | 2591 (36.1) | 1631 (34.8) | .. | 575 (31.8)  | 299 (32.8) | ..      |
|                                      | 2005-2010         | 3213 (44.7) | 4380 (60.8) | ..      | 3243 (45.2) | 2517 (53.7) | .. | 992 (54.9)  | 524 (57.5) | ..      |
| Length of baseline visit             | ..                | ..          | ..          | 0.0075  | ..          | ..          | .. | ..          | ..         | <0.0001 |
|                                      | 1 day             | 5688 (79.1) | 5666 (78.6) | ..      | 3944 (55.0) | 2753 (58.8) | .. | 773 (42.8)  | 411 (45.1) | ..      |
|                                      | 2 days-3 months   | 642 (8.9)   | 731 (10.1)  | ..      | 1428 (19.9) | 915 (19.5)  | .. | 334 (18.5)  | 228 (25.0) | ..      |
|                                      | 3-6 months        | 469 (6.5)   | 481 (6.7)   | ..      | 897 (12.5)  | 506 (10.8)  | .. | 316 (17.5)  | 126 (13.8) | ..      |
|                                      | ≥6 months         | 395 (5.5)   | 329 (4.6)   | ..      | 900 (12.6)  | 509 (10.9)  | .. | 385 (21.3)  | 146 (16.0) | ..      |
| Family history of cancer/CRC         | ..                | ..          | ..          | <0.0001 | ..          | ..          | .. | ..          | ..         | <0.0001 |
|                                      | No                | 6106 (84.9) | 6830 (94.8) | ..      | 6790 (94.7) | 4576 (97.7) | .. | 1724 (95.4) | 897 (98.5) | ..      |
|                                      | Yes               | 1088 (15.1) | 377 (5.2)   | ..      | 379 (5.3)   | 107 (2.3)   | .. | 84 (4.6)    | 14 (1.5)   | ..      |
| Number of hyperplastic polyps        | ..                | ..          | ..          | <0.0001 | ..          | ..          | .. | ..          | ..         | <0.0001 |
|                                      | 0                 | 5597 (77.8) | 5938 (82.4) | ..      | 5783 (80.7) | 4010 (85.6) | .. | 1230 (68.0) | 699 (76.7) | ..      |
|                                      | 1                 | 972 (13.5)  | 818 (11.4)  | ..      | 862 (12.0)  | 433 (9.2)   | .. | 310 (17.1)  | 129 (14.2) | ..      |
|                                      | ≥2                | 625 (8.7)   | 451 (6.3)   | ..      | 524 (7.3)   | 240 (5.1)   | .. | 268 (14.8)  | 83 (9.1)   | ..      |
| Any large (≥10mm) hyperplastic polyp | ..                | ..          | ..          | 0.39    | ..          | ..          | .. | ..          | ..         | 0.11    |
|                                      | No                | 7120 (99.0) | 7143 (99.1) | ..      | 7035 (98.1) | 4633 (98.9) | .. | 1756 (97.1) | 894 (98.1) | ..      |
|                                      | Yes               | 74 (1.0)    | 64 (0.9)    | ..      | 134 (1.9)   | 50 (1.1)    | .. | 52 (2.9)    | 17 (1.9)   | ..      |

mm= millimetre. CRC=colorectal cancer.

p-values calculated with  $\chi^2$  test to compare patients with and without surveillance.

†Adenoma size was defined according to the largest adenoma seen at baseline.

‡Adenoma histology and dysplasia were defined according to the worst histology (greatest degree of villousness) and worst dysplasia (highest grade) seen at baseline, respectively.

Supplementary Table 2: Number of surveillance visits, sex, age, year of baseline, and median follow-up time by risk subgroup

|                                      | Low-risk group (n=14 401) |            |                       |            | Intermediate-risk group (n=11 852) |                      |            |                       | High-risk group (n=2719) |         |                      |            |                       |            |         |
|--------------------------------------|---------------------------|------------|-----------------------|------------|------------------------------------|----------------------|------------|-----------------------|--------------------------|---------|----------------------|------------|-----------------------|------------|---------|
|                                      | Lower-risk subgroup*      |            | Higher-risk subgroup* |            | p-value                            | Lower-risk subgroup† |            | Higher-risk subgroup† |                          | p-value | Lower-risk subgroup‡ |            | Higher-risk subgroup‡ |            | p-value |
|                                      | n                         | (%)        | n                     | (%)        |                                    | n                    | (%)        | n                     | (%)                      |         | n                    | (%)        | n                     | (%)        |         |
| Total                                | 5235                      | (36.4)     | 9166                  | (63.6)     | ..                                 | 4738                 | (40.0)     | 7114                  | (60.0)                   | ..      | 1817                 | (66.8)     | 902                   | (33.2)     | ..      |
| Number of surveillance visits        | ..                        | ..         | ..                    | ..         | <0.0001                            | ..                   | ..         | ..                    | ..                       | <0.0001 | ..                   | ..         | ..                    | ..         | 0.24    |
| 0                                    | 2804                      | (53.6)     | 4403                  | (48.0)     | ..                                 | 1932                 | (40.8)     | 2751                  | (38.7)                   | ..      | 606                  | (33.4)     | 305                   | (33.8)     | ..      |
| 1                                    | 1432                      | (27.4)     | 2527                  | (27.6)     | ..                                 | 1387                 | (29.3)     | 1956                  | (27.5)                   | ..      | 474                  | (26.1)     | 221                   | (24.5)     | ..      |
| 2                                    | 661                       | (12.6)     | 1282                  | (14.0)     | ..                                 | 930                  | (19.6)     | 1349                  | (19.0)                   | ..      | 407                  | (22.4)     | 186                   | (20.6)     | ..      |
| ≥3                                   | 338                       | (6.5)      | 954                   | (10.4)     | ..                                 | 489                  | (10.3)     | 1058                  | (14.9)                   | ..      | 330                  | (18.2)     | 190                   | (21.1)     | ..      |
| Sex                                  | ..                        | ..         | ..                    | ..         | 0.97                               | ..                   | ..         | ..                    | ..                       | 0.050   | ..                   | ..         | ..                    | ..         | 0.21    |
| Women                                | 2319                      | (44.3)     | 4063                  | (44.3)     | ..                                 | 2159                 | (45.6)     | 3112                  | (43.7)                   | ..      | 520                  | (28.6)     | 279                   | (30.9)     | ..      |
| Men                                  | 2916                      | (55.7)     | 5103                  | (55.7)     | ..                                 | 2579                 | (54.4)     | 4002                  | (56.3)                   | ..      | 1297                 | (71.4)     | 623                   | (69.1)     | ..      |
| Age, years                           | ..                        | ..         | ..                    | ..         | <0.0001                            | ..                   | ..         | ..                    | ..                       | <0.0001 | ..                   | ..         | ..                    | ..         | 0.079   |
| <55                                  | 1523                      | (29.1)     | 2046                  | (22.3)     | ..                                 | 984                  | (20.8)     | 1113                  | (15.6)                   | ..      | 180                  | (9.9)      | 103                   | (11.4)     | ..      |
| 55-64                                | 1452                      | (27.7)     | 2539                  | (27.7)     | ..                                 | 1310                 | (27.6)     | 1848                  | (26.0)                   | ..      | 514                  | (28.3)     | 236                   | (26.2)     | ..      |
| 65-74                                | 1442                      | (27.5)     | 2816                  | (30.7)     | ..                                 | 1513                 | (31.9)     | 2402                  | (33.8)                   | ..      | 729                  | (40.1)     | 336                   | (37.3)     | ..      |
| ≥75                                  | 818                       | (15.6)     | 1765                  | (19.3)     | ..                                 | 931                  | (19.6)     | 1751                  | (24.6)                   | ..      | 394                  | (21.7)     | 227                   | (25.2)     | ..      |
| Year of baseline visit               | ..                        | ..         | ..                    | ..         | <0.0001                            | ..                   | ..         | ..                    | ..                       | <0.0001 | ..                   | ..         | ..                    | ..         | <0.0001 |
| 1984-1999                            | 441                       | (8.4)      | 1199                  | (13.1)     | ..                                 | 630                  | (13.3)     | 1240                  | (17.4)                   | ..      | 175                  | (9.6)      | 154                   | (17.1)     | ..      |
| 2000-2004                            | 1761                      | (33.6)     | 3407                  | (37.2)     | ..                                 | 1461                 | (30.8)     | 2761                  | (38.8)                   | ..      | 520                  | (28.6)     | 354                   | (39.2)     | ..      |
| 2005-2010                            | 3033                      | (57.9)     | 4560                  | (49.7)     | ..                                 | 2647                 | (55.9)     | 3113                  | (43.8)                   | ..      | 1122                 | (61.8)     | 394                   | (43.7)     | ..      |
| Follow-up time, years (median [IQR]) | 9.5                       | (7.3-11.9) | 9.6                   | (7.1-12.6) | 0.023¶                             | 9.1                  | (7.0-11.9) | 9.2                   | (6.1-12.6)               | 0.98¶   | 8.3                  | (6.0-10.6) | 8.5                   | (4.9-12.2) | 0.028¶  |

p-values calculated with  $\chi^2$  test to compare patients in the lower-risk and higher-risk subgroups, unless indicated otherwise.

\*The higher-risk subgroup included patients with an incomplete colonoscopy or colonoscopy of unknown completeness, a tubulovillous or villous adenoma, or proximal polyps at baseline; the lower-risk subgroup included patients with none of these factors.

†The higher-risk subgroup included patients with an incomplete colonoscopy or colonoscopy of unknown completeness, an adenoma with high-grade dysplasia, or proximal polyps at baseline; the lower-risk subgroup included patients with none of these factors.

‡The higher-risk subgroup included patients with an incomplete colonoscopy or colonoscopy of unknown completeness or an adenoma with high-grade dysplasia at baseline; the lower-risk subgroup included patients with none of these factors.

¶p-values calculated with Wilcoxon rank sum test to compare the lower-risk and higher-risk subgroups.

**Supplementary Table 3: Long-term colorectal cancer incidence in the low-risk group by baseline characteristics and number of surveillance visits, including only patients with a complete baseline colonoscopy**

|                                | n      | (%)    | Person-years | CRC cases | Incidence per 100,000 person years (95% CI) | Univariable HR (95% CI) | p-value | Multivariable HR (95% CI) | p-value |
|--------------------------------|--------|--------|--------------|-----------|---------------------------------------------|-------------------------|---------|---------------------------|---------|
| Total                          | 11,719 | (100)  | 108,319      | 144       | 133 (113-157)                               | ..                      | ..      | ..                        | ..      |
| Number of surveillance visits* | ..     | ..     | ..           | ..        | ..                                          | ..                      | <0.0001 | ..                        | 0.0001  |
| 0                              | 6149   | (52.5) | 69,666       | 108       | 155 (128-187)                               | 1                       | ..      | 1                         | ..      |
| 1                              | 3222   | (27.5) | 25,706       | 29        | 113 (78-162)                                | 0.54 (0.35-0.82)        | ..      | 0.56 (0.36-0.85)          | ..      |
| 2                              | 1515   | (12.9) | 9055         | 5         | 55 (23-133)                                 | 0.22 (0.09-0.56)        | ..      | 0.24 (0.10-0.61)          | ..      |
| ≥3                             | 833    | (7.1)  | 3893         | 2         | 51 (13-205)                                 | 0.18 (0.04-0.77)        | ..      | 0.20 (0.05-0.83)          | ..      |
| Sex                            | ..     | ..     | ..           | ..        | ..                                          | ..                      | 1.00    | ..                        | 0.70    |
| Women                          | 5128   | (43.8) | 48,698       | 65        | 133 (105-170)                               | 1                       | ..      | 1                         | ..      |
| Men                            | 6591   | (56.2) | 59,621       | 79        | 133 (106-165)                               | 1.00 (0.72-1.39)        | ..      | 1.07 (0.77-1.48)          | ..      |
| Age, years                     | ..     | ..     | ..           | ..        | ..                                          | ..                      | <0.0001 | ..                        | <0.0001 |
| <55                            | 2852   | (24.3) | 30,666       | 14        | 46 (27-77)                                  | 1                       | ..      | 1                         | ..      |
| 55-64                          | 3268   | (27.9) | 32,845       | 35        | 107 (77-148)                                | 2.37 (1.28-4.41)        | ..      | 2.27 (1.22-4.22)          | ..      |
| 65-74                          | 3487   | (29.8) | 30,653       | 60        | 196 (152-252)                               | 4.50 (2.51-8.07)        | ..      | 4.00 (2.23-7.17)          | ..      |
| ≥75                            | 2112   | (18.0) | 14,156       | 35        | 247 (178-344)                               | 6.10 (3.27-11.39)       | ..      | 4.92 (2.62-9.22)          | ..      |
| Number of adenomas             | ..     | ..     | ..           | ..        | ..                                          | ..                      | 0.21    | ..                        | 0.55    |
| 1                              | 9554   | (81.5) | 88,674       | 112       | 126 (105-152)                               | 1                       | ..      | 1                         | ..      |
| 2                              | 2165   | (18.5) | 19,646       | 32        | 163 (115-230)                               | 1.30 (0.88-1.92)        | ..      | 1.13 (0.76-1.69)          | ..      |
| Adenoma histology†             | ..     | ..     | ..           | ..        | ..                                          | ..                      | 0.066   | ..                        | 0.060   |
| Tubular                        | 9253   | (79.0) | 85,190       | 103       | 121 (100-147)                               | 1                       | ..      | 1                         | ..      |
| Tubulovillous                  | 1587   | (13.5) | 14,364       | 30        | 209 (146-299)                               | 1.65 (1.10-2.46)        | ..      | 1.67 (1.11-2.49)          | ..      |
| Villous                        | 124    | (1.1)  | 1230         | 1         | 81 (11-577)                                 | ..                      | ..      | ..                        | ..      |
| Unknown                        | 755    | (6.4)  | 7536         | 10        | 133 (71-247)                                | 1.07 (0.56-2.06)        | ..      | 1.15 (0.60-2.21)          | ..      |
| Adenoma dysplasia†             | ..     | ..     | ..           | ..        | ..                                          | ..                      | 0.36    | ..                        | 0.38    |
| Low-grade                      | 10,993 | (93.8) | 100,640      | 132       | 131 (111-156)                               | 1                       | ..      | 1                         | ..      |
| High-grade                     | 262    | (2.2)  | 2424         | 6         | 247 (111-551)                               | 1.86 (0.82-4.21)        | ..      | 1.85 (0.81-4.25)          | ..      |
| Unknown                        | 464    | (4.0)  | 5255         | 6         | 114 (51-254)                                | 0.84 (0.37-1.90)        | ..      | 0.87 (0.38-2.00)          | ..      |
| Proximal polyps                | ..     | ..     | ..           | ..        | ..                                          | ..                      | 0.0025  | ..                        | 0.0050  |
| No                             | 6251   | (53.3) | 59,177       | 61        | 103 (80-132)                                | 1                       | ..      | 1                         | ..      |
| Yes                            | 5468   | (46.7) | 49,142       | 83        | 169 (136-209)                               | 1.66 (1.19-2.31)        | ..      | 1.61 (1.15-2.24)          | ..      |
| Bowel preparation quality      | ..     | ..     | ..           | ..        | ..                                          | ..                      | 0.058   | ..                        | 0.11    |
| Excellent or good              | 3998   | (34.1) | 38,324       | 66        | 172 (135-219)                               | 1                       | ..      | 1                         | ..      |
| Satisfactory                   | 2294   | (19.6) | 19,860       | 26        | 131 (89-192)                                | 0.77 (0.49-1.22)        | ..      | 0.74 (0.47-1.17)          | ..      |
| Poor                           | 737    | (6.3)  | 5958         | 7         | 117 (56-246)                                | 0.70 (0.32-1.52)        | ..      | 0.69 (0.31-1.49)          | ..      |
| Unknown                        | 4690   | (40.0) | 44,177       | 45        | 102 (76-136)                                | 0.59 (0.41-0.87)        | ..      | 0.63 (0.43-0.92)          | ..      |
| Year of baseline visit         | ..     | ..     | ..           | ..        | ..                                          | ..                      | 0.93    | ..                        | 0.80    |
| 1984-1994                      | 941    | (8.0)  | 12,859       | 17        | 132 (82-213)                                | 1                       | ..      | 1                         | ..      |
| 2000-2004                      | 3839   | (32.8) | 41,000       | 57        | 139 (107-180)                               | 1.09 (0.61-1.95)        | ..      | 0.88 (0.49-1.57)          | ..      |
| 2005-2010                      | 6939   | (59.2) | 54,460       | 70        | 129 (102-162)                               | 1.12 (0.62-2.03)        | ..      | 0.81 (0.45-1.48)          | ..      |
| Length of baseline visit       | ..     | ..     | ..           | ..        | ..                                          | ..                      | 0.54    | ..                        | 0.51    |
| 1 day                          | 9214   | (78.6) | 85,093       | 112       | 132 (109-158)                               | 1                       | ..      | 1                         | ..      |
| 2 days-3 months                | 1118   | (9.5)  | 9808         | 16        | 163 (100-266)                               | 1.26 (0.74-2.12)        | ..      | 1.33 (0.78-2.27)          | ..      |
| 3-6 months                     | 781    | (6.7)  | 7455         | 11        | 148 (82-266)                                | 1.11 (0.60-2.07)        | ..      | 1.27 (0.68-2.38)          | ..      |
| ≥6 months                      | 606    | (5.2)  | 5963         | 5         | 84 (35-201)                                 | 0.63 (0.26-1.54)        | ..      | 0.71 (0.29-1.74)          | ..      |

CI=confidence interval. CRC=colorectal cancer. HR=hazard ratio.

The multivariable model contained number of surveillance visits, age, adenoma histology, and proximal polyps, the variables selected in the final multivariable model for all low-risk patients in the main analysis (except for colonoscopy completeness), as presented in Table 1. For these variables, the multivariable HRs were from the multivariable model and the p-values were for inclusion of the variable in the model, calculated with the likelihood ratio test. For the remaining variables, the multivariable HRs were for if the variable was added as an additional variable to the multivariable model.

\*The number of surveillance visits was included as a time-varying covariate; patients who attended any surveillance contributed person-years to more than one category of number of surveillance visits.

†Adenoma histology and dysplasia were defined according to the worst histology (greatest degree of villousness) and worst dysplasia (highest grade) seen at baseline, respectively.

**Supplementary Table 4: Long-term colorectal cancer incidence in the intermediate-risk group by baseline characteristics and number of surveillance visits, including only patients with a complete baseline colonoscopy**

|                                | n    | (%)    | Person<br>-years | CRC<br>case<br>s | Incidence per<br>100,000 person<br>years (95% CI) | Univariable HR<br>(95% CI) | p-value | Multivariable HR<br>(95% CI) | p-value |
|--------------------------------|------|--------|------------------|------------------|---------------------------------------------------|----------------------------|---------|------------------------------|---------|
| Total                          | 8967 | (100)  | 80,572           | 150              | 186 (159-218)                                     | ..                         | ..      | ..                           | ..      |
| Number of surveillance visits* | ..   | ..     | ..               | ..               | ..                                                | ..                         | 0.0041  | ..                           | 0.0080  |
| 0                              | 3605 | (40.2) | 40,921           | 85               | 208 (168-257)                                     | 1                          | ..      | 1                            | ..      |
| 1                              | 2565 | (28.6) | 24,087           | 41               | 170 (125-231)                                     | 0.63 (0.43-0.93)           | ..      | 0.64 (0.43-0.95)             | ..      |
| 2                              | 1755 | (19.6) | 10,462           | 16               | 153 (94-250)                                      | 0.47 (0.27-0.83)           | ..      | 0.50 (0.28-0.88)             | ..      |
| ≥3                             | 1042 | (11.6) | 5103             | 8                | 157 (78-313)                                      | 0.36 (0.17-0.78)           | ..      | 0.36 (0.16-0.79)             | ..      |
| Sex                            | ..   | ..     | ..               | ..               | ..                                                | ..                         | 0.80    | ..                           | 0.38    |
| Women                          | 3874 | (43.2) | 36,048           | 66               | 183 (144-233)                                     | 1                          | ..      | 1                            | ..      |
| Men                            | 5093 | (56.8) | 44,524           | 84               | 189 (152-234)                                     | 1.04 (0.76-1.44)           | ..      | 1.16 (0.83-1.61)             | ..      |
| Age, years                     | ..   | ..     | ..               | ..               | ..                                                | ..                         | <0.0001 | ..                           | <0.0001 |
| <55                            | 1573 | (17.5) | 17,584           | 18               | 102 (64-162)                                      | 1                          | ..      | 1                            | ..      |
| 55-64                          | 2416 | (26.9) | 24,093           | 25               | 104 (70-154)                                      | 1.06 (0.58-1.94)           | ..      | 1.04 (0.57-1.91)             | ..      |
| 65-74                          | 3013 | (33.6) | 26,134           | 63               | 241 (188-309)                                     | 2.64 (1.56-4.47)           | ..      | 2.52 (1.48-4.28)             | ..      |
| ≥75                            | 1965 | (21.9) | 12,761           | 44               | 345 (257-463)                                     | 4.13 (2.36-7.21)           | ..      | 3.49 (1.99-6.14)             | ..      |
| Number of adenomas             | ..   | ..     | ..               | ..               | ..                                                | ..                         | 0.24    | ..                           | 0.40    |
| 1                              | 5665 | (63.2) | 52,222           | 92               | 176 (144-216)                                     | 1                          | ..      | 1                            | ..      |
| 2                              | 2461 | (27.5) | 21,306           | 48               | 225 (170-299)                                     | 1.31 (0.92-1.86)           | ..      | 1.05 (0.73-1.52)             | ..      |
| 3 or 4                         | 841  | (9.4)  | 7044             | 10               | 142 (76-264)                                      | 0.84 (0.44-1.62)           | ..      | 0.67 (0.33-1.32)             | ..      |
| Adenoma size, mm†              | ..   | ..     | ..               | ..               | ..                                                | ..                         | 0.21    | ..                           | 0.21    |
| <10                            | 841  | (9.4)  | 7044             | 10               | 142 (76-264)                                      | 1                          | ..      | 1                            | ..      |
| 10-19                          | 5160 | (57.5) | 46,777           | 80               | 171 (137-213)                                     | 1.16 (0.60-2.24)           | ..      | 1.43 (0.73-2.83)             | ..      |
| ≥20                            | 2966 | (33.1) | 26,751           | 60               | 224 (174-289)                                     | 1.52 (0.78-2.98)           | ..      | 1.77 (0.87-3.57)             | ..      |
| Adenoma histology‡             | ..   | ..     | ..               | ..               | ..                                                | ..                         | <0.0001 | ..                           | 0.0003  |
| Tubular                        | 3660 | (40.8) | 33,091           | 41               | 124 (91-168)                                      | 1                          | ..      | 1                            | ..      |
| Tubulovillous                  | 4204 | (46.9) | 37,334           | 76               | 204 (163-255)                                     | 1.67 (1.14-2.44)           | ..      | 1.62 (1.10-2.38)             | ..      |
| Villous                        | 768  | (8.6)  | 6812             | 15               | 220 (133-365)                                     | 1.80 (1.00-3.25)           | ..      | 1.39 (0.75-2.56)             | ..      |
| Unknown                        | 335  | (3.7)  | 3334             | 18               | 540 (340-857)                                     | 4.17 (2.39-7.28)           | ..      | 4.28 (2.27-8.08)             | ..      |
| Adenoma dysplasia‡             | ..   | ..     | ..               | ..               | ..                                                | ..                         | 0.11    | ..                           | 0.20    |
| Low-grade                      | 7251 | (80.9) | 64,995           | 111              | 171 (142-206)                                     | 1                          | ..      | 1                            | ..      |
| High-grade                     | 1473 | (16.4) | 12,621           | 29               | 230 (160-331)                                     | 1.36 (0.90-2.05)           | ..      | 1.23 (0.81-1.87)             | ..      |
| Unknown                        | 243  | (2.7)  | 2956             | 10               | 338 (182-629)                                     | 1.82 (0.95-3.49)           | ..      | 1.80 (0.92-3.50)             | ..      |
| Proximal polyps                | ..   | ..     | ..               | ..               | ..                                                | ..                         | 0.0009  | ..                           | 0.0007  |
| No                             | 5781 | (64.5) | 53,627           | 81               | 151 (121-188)                                     | 1                          | ..      | 1                            | ..      |
| Yes                            | 3186 | (35.5) | 26,945           | 69               | 256 (202-324)                                     | 1.74 (1.26-2.40)           | ..      | 1.77 (1.28-2.45)             | ..      |
| Bowel preparation quality      | ..   | ..     | ..               | ..               | ..                                                | ..                         | 0.11    | ..                           | 0.093   |
| Excellent or good              | 3046 | (34.0) | 27,581           | 46               | 167 (125-223)                                     | 1                          | ..      | 1                            | ..      |
| Satisfactory                   | 1664 | (18.6) | 13,640           | 28               | 205 (142-297)                                     | 1.27 (0.79-2.03)           | ..      | 1.34 (0.83-2.14)             | ..      |
| Poor                           | 454  | (5.1)  | 3320             | 12               | 361 (205-636)                                     | 2.24 (1.19-4.23)           | ..      | 2.00 (1.05-3.78)             | ..      |
| Unknown                        | 3803 | (42.4) | 36,031           | 64               | 178 (139-227)                                     | 1.02 (0.70-1.50)           | ..      | 0.92 (0.62-1.37)             | ..      |
| Year of baseline visit         | ..   | ..     | ..               | ..               | ..                                                | ..                         | 0.061   | ..                           | 0.020   |
| 1984-1999                      | 1044 | (11.6) | 13,531           | 41               | 303 (223-412)                                     | 1                          | ..      | 1                            | ..      |
| 2000-2004                      | 2805 | (31.3) | 28,734           | 53               | 184 (141-241)                                     | 0.63 (0.41-0.96)           | ..      | 0.55 (0.36-0.86)             | ..      |
| 2005-2010                      | 5118 | (57.1) | 38,307           | 56               | 146 (113-190)                                     | 0.59 (0.37-0.93)           | ..      | 0.54 (0.33-0.86)             | ..      |
| Length of baseline visit       | ..   | ..     | ..               | ..               | ..                                                | ..                         | 0.048   | ..                           | 0.019   |
| 1 day                          | 5040 | (56.2) | 44,805           | 67               | 150 (118-190)                                     | 1                          | ..      | 1                            | ..      |
| 2 days-3 months                | 1766 | (19.7) | 16,001           | 36               | 225 (162-312)                                     | 1.52 (1.01-2.27)           | ..      | 1.75 (1.16-2.64)             | ..      |
| 3-6 months                     | 1083 | (12.1) | 10,070           | 21               | 209 (136-320)                                     | 1.39 (0.85-2.27)           | ..      | 1.44 (0.88-2.37)             | ..      |
| ≥6 months                      | 1078 | (12.0) | 9695             | 26               | 268 (183-394)                                     | 1.77 (1.13-2.79)           | ..      | 1.79 (1.12-2.85)             | ..      |

CI=confidence interval. CRC=colorectal cancer. HR=hazard ratio. mm= millimetre.

The multivariable model contained number of surveillance visits, age, adenoma dysplasia, proximal polyps, year of baseline visit, and length of baseline visit, the variables selected in the final multivariable model for all intermediate-risk patients in the main analysis (except for colonoscopy completeness), as presented in Table 2.

For these variables, the multivariable HRs were from the multivariable model and the p-values were for inclusion of the variable in the model, calculated with the likelihood ratio test. For the remaining variables, the multivariable HRs were for if the variable was added as an additional variable to the multivariable model.

\*The number of surveillance visits was included as a time-varying covariate; patients who attended any surveillance contributed person-years to more than one category of number of surveillance visits.

†Adenoma size was defined according to the largest adenoma seen at baseline.

‡Adenoma histology and dysplasia were defined according to the worst histology (greatest degree of villousness) and worst dysplasia (highest grade) seen at baseline, respectively.

**Supplementary Table 5: Long-term colorectal cancer incidence in the high-risk group by baseline characteristics and number of surveillance visits, including only patients with a complete baseline colonoscopy**

|                                | n    | (%)    | Person-years | CRC cases | Incidence per 100,000 person years (95% CI) | Univariable HR (95% CI) | p-value | Multivariable HR (95% CI) | p-value |
|--------------------------------|------|--------|--------------|-----------|---------------------------------------------|-------------------------|---------|---------------------------|---------|
| Total                          | 2354 | (100)  | 19,266       | 64        | 332 (260-424)                               | ..                      | ..      | ..                        | ..      |
| Number of surveillance visits* | ..   | ..     | ..           | ..        | ..                                          | ..                      | 0.012   | ..                        | 0.0069  |
| 0                              | 780  | (33.1) | 7847         | 33        | 421 (299-592)                               | 1                       | ..      | 1                         | ..      |
| 1                              | 623  | (26.5) | 6181         | 19        | 307 (196-482)                               | 0.51 (0.29-0.91)        | ..      | 0.50 (0.28-0.89)          | ..      |
| 2                              | 518  | (22.0) | 3303         | 7         | 212 (101-445)                               | 0.30 (0.13-0.70)        | ..      | 0.28 (0.12-0.66)          | ..      |
| ≥3                             | 433  | (18.4) | 1935         | 5         | 258 (108-621)                               | 0.40 (0.14-1.09)        | ..      | 0.37 (0.14-1.03)          | ..      |
| Sex                            | ..   | ..     | ..           | ..        | ..                                          | ..                      | 0.72    | ..                        | 0.81    |
| Women                          | 669  | (28.4) | 5648         | 20        | 354 (228-549)                               | 1                       | ..      | 1                         | ..      |
| Men                            | 1685 | (71.6) | 13,618       | 44        | 323 (240-434)                               | 0.91 (0.54-1.54)        | ..      | 0.94 (0.55-1.59)          | ..      |
| Age, years                     | ..   | ..     | ..           | ..        | ..                                          | ..                      | 0.045   | ..                        | 0.20    |
| <55                            | 224  | (9.5)  | 2445         | 4         | 164 (61-436)                                | 1                       | ..      | 1                         | ..      |
| 55-64                          | 655  | (27.8) | 5915         | 15        | 254 (153-421)                               | 1.56 (0.52-4.70)        | ..      | 1.59 (0.53-4.79)          | ..      |
| 65-74                          | 942  | (40.0) | 7580         | 27        | 356 (244-519)                               | 2.21 (0.77-6.34)        | ..      | 2.13 (0.74-6.11)          | ..      |
| ≥75                            | 533  | (22.6) | 3325         | 18        | 541 (341-859)                               | 3.45 (1.16-10.25)       | ..      | 2.70 (0.90-8.05)          | ..      |
| Number of adenomas             | ..   | ..     | ..           | ..        | ..                                          | ..                      | 0.89    | ..                        | 0.81    |
| 3                              | 1038 | (44.1) | 8736         | 27        | 309 (212-451)                               | 1                       | ..      | 1                         | ..      |
| 4                              | 496  | (21.1) | 4016         | 13        | 324 (188-557)                               | 1.05 (0.54-2.04)        | ..      | 1.09 (0.56-2.12)          | ..      |
| 5                              | 400  | (17.0) | 3180         | 13        | 409 (237-704)                               | 1.31 (0.67-2.53)        | ..      | 1.39 (0.72-2.71)          | ..      |
| ≥6                             | 420  | (17.8) | 3333         | 11        | 330 (183-596)                               | 1.07 (0.53-2.16)        | ..      | 1.17 (0.57-2.37)          | ..      |
| Adenoma size, mm <sup>†</sup>  | ..   | ..     | ..           | ..        | ..                                          | ..                      | 0.38    | ..                        | 0.78    |
| <10                            | 225  | (9.6)  | 1893         | 5         | 264 (110-635)                               | 1                       | ..      | 1                         | ..      |
| 10-19                          | 1168 | (49.6) | 9566         | 28        | 293 (202-424)                               | 1.12 (0.43-2.90)        | ..      | 0.99 (0.38-2.57)          | ..      |
| ≥20                            | 947  | (40.2) | 7683         | 31        | 403 (284-574)                               | 1.55 (0.60-3.98)        | ..      | 1.19 (0.45-3.14)          | ..      |
| Unknown                        | 14   | (0.6)  | 123          | 0         | 0 NA                                        | NA                      | ..      | NA                        | ..      |
| Adenoma histology <sup>‡</sup> | ..   | ..     | ..           | ..        | ..                                          | ..                      | 0.24    | ..                        | 0.49    |
| Tubular                        | 886  | (37.6) | 7379         | 22        | 298 (196-453)                               | 1                       | ..      | 1                         | ..      |
| Tubulovillous                  | 1151 | (48.9) | 9278         | 30        | 323 (226-462)                               | 1.10 (0.63-1.91)        | ..      | 0.99 (0.57-1.73)          | ..      |
| Villous                        | 277  | (11.8) | 2197         | 12        | 546 (310-962)                               | 1.85 (0.92-3.74)        | ..      | 1.49 (0.72-3.07)          | ..      |
| Unknown                        | 40   | (1.7)  | 411          | 0         | 0 NA                                        | NA                      | ..      | NA                        | ..      |
| Adenoma dysplasia <sup>‡</sup> | ..   | ..     | ..           | ..        | ..                                          | ..                      | 0.0010  | ..                        | 0.0005  |
| Low-grade                      | 1783 | (75.7) | 14,680       | 38        | 259 (188-356)                               | 1                       | ..      | 1                         | ..      |
| High-grade                     | 537  | (22.8) | 4234         | 26        | 614 (418-902)                               | 2.40 (1.46-3.95)        | ..      | 2.51 (1.52-4.14)          | ..      |
| Unknown                        | 34   | (1.4)  | 352          | 0         | 0 NA                                        | NA                      | ..      | NA                        | ..      |
| Proximal polyps                | ..   | ..     | ..           | ..        | ..                                          | ..                      | 0.29    | ..                        | 0.18    |
| No                             | 465  | (19.8) | 3982         | 10        | 251 (135-467)                               | 1                       | ..      | 1                         | ..      |
| Yes                            | 1889 | (80.3) | 15,284       | 54        | 353 (271-461)                               | 1.42 (0.72-2.79)        | ..      | 1.56 (0.79-3.07)          | ..      |
| Bowel preparation quality      | ..   | ..     | ..           | ..        | ..                                          | ..                      | 0.64    | ..                        | 0.68    |
| Excellent or good              | 935  | (39.7) | 7922         | 24        | 303 (203-452)                               | 1                       | ..      | 1                         | ..      |
| Satisfactory                   | 385  | (16.4) | 2903         | 10        | 344 (185-640)                               | 1.13 (0.54-2.37)        | ..      | 0.99 (0.47-2.07)          | ..      |
| Poor                           | 129  | (5.5)  | 852          | 5         | 587 (244-1410)                              | 1.99 (0.76-5.21)        | ..      | 1.88 (0.71-4.95)          | ..      |
| Unknown                        | 905  | (38.5) | 7588         | 25        | 329 (223-488)                               | 1.11 (0.64-1.95)        | ..      | 1.09 (0.62-1.91)          | ..      |
| Year of baseline visit         | ..   | ..     | ..           | ..        | ..                                          | ..                      | 0.56    | ..                        | 0.69    |
| 1984-1999                      | 221  | (9.4)  | 2610         | 5         | 192 (80-460)                                | 1                       | ..      | 1                         | ..      |
| 2000-2004                      | 685  | (29.1) | 6383         | 24        | 376 (252-561)                               | 1.64 (0.63-4.31)        | ..      | 1.50 (0.57-3.94)          | ..      |
| 2005-2010                      | 1448 | (61.5) | 10,273       | 35        | 341 (245-475)                               | 1.54 (0.59-4.01)        | ..      | 1.41 (0.54-3.70)          | ..      |
| Length of baseline visit       | ..   | ..     | ..           | ..        | ..                                          | ..                      | 0.79    | ..                        | 0.96    |
| 1 day                          | 1021 | (43.4) | 8406         | 25        | 297 (201-440)                               | 1                       | ..      | 1                         | ..      |
| 2 days-3 months                | 471  | (20.0) | 3662         | 13        | 355 (206-611)                               | 1.20 (0.61-2.35)        | ..      | 1.04 (0.53-2.04)          | ..      |
| 3-6 months                     | 389  | (16.5) | 3214         | 10        | 311 (167-578)                               | 1.05 (0.50-2.18)        | ..      | 0.95 (0.45-2.00)          | ..      |
| ≥6 months                      | 473  | (20.1) | 3984         | 16        | 402 (246-656)                               | 1.37 (0.73-2.57)        | ..      | 1.15 (0.60-2.20)          | ..      |

CI=confidence interval. CRC=colorectal cancer. HR=hazard ratio. mm= millimetre. NA=not applicable.

All patients with unknown adenoma dysplasia were excluded from the multivariable model as no events occurred in these patients. The multivariable model contained number of surveillance visits and adenoma



dysplasia, the variables selected in the final multivariable model for all high-risk patients in the main analysis (except for colonoscopy completeness), as presented in Table 3. For these variables, the multivariable HRs were from the multivariable model and the p-values were for inclusion of the variable in the model, calculated with the likelihood ratio test. For the remaining variables, the multivariable HRs were for if the variable was added as an additional variable to the multivariable model.

\*The number of surveillance visits was included as a time-varying covariate; patients who attended any surveillance contributed person-years to more than one category of number of surveillance visits.

†Adenoma size was defined according to the largest adenoma seen at baseline.

‡Adenoma histology and dysplasia were defined according to the worst histology (greatest degree of villousness) and worst dysplasia (highest grade) seen at baseline, respectively.

**Supplementary Table 6: Incidence of colorectal cancer and unadjusted effect of surveillance on colorectal cancer incidence by number of surveillance visits, including only patients with a complete baseline colonoscopy**

|                                |                       | n      | (%)    | Person-years | CRC cases     | Incidence per 100,000 person-years (95% CI) | Effect of surveillance* |         |
|--------------------------------|-----------------------|--------|--------|--------------|---------------|---------------------------------------------|-------------------------|---------|
|                                |                       |        |        |              |               |                                             | Univariable HR (95% CI) | p-value |
| <b>Low-risk group</b>          | Whole risk group      | ..     | ..     | ..           | ..            | ..                                          | ..                      | <0.0001 |
|                                | 0 visits              | 6149   | (52.5) | 69,666       | 108           | 155 (128-187)                               | 1                       | ..      |
|                                | 1 visit               | 3222   | (27.5) | 25,706       | 29            | 113 (78-162)                                | 0.54 (0.35-0.82)        | ..      |
|                                | ≥2 visits             | 2348   | (20.0) | 12,948       | 7             | 54 (26-113)                                 | 0.21 (0.10-0.47)        | ..      |
|                                | Total                 | 11,719 | (100)  | 108,319      | 144           | 133 (113-157)                               | ..                      | ..      |
|                                | Lower-risk subgroup†  | ..     | ..     | ..           | ..            | ..                                          | ..                      | 0.15    |
|                                | 0 visits              | 2804   | (53.6) | 32,903       | 31            | 94 (66-134)                                 | 1                       | ..      |
|                                | 1 visit               | 1432   | (27.4) | 11,410       | 8             | 70 (35-140)                                 | 0.54 (0.25-1.20)        | ..      |
|                                | ≥2 visits             | 999    | (19.1) | 5472         | 3             | 55 (18-170)                                 | 0.42 (0.12-1.48)        | ..      |
|                                | Total                 | 5235   | (44.7) | 49,785       | 42            | 84 (62-114)                                 | ..                      | ..      |
|                                | Higher-risk subgroup† | ..     | ..     | ..           | ..            | ..                                          | ..                      | <0.0001 |
|                                | 0 visits              | 3345   | (51.6) | 36,763       | 77            | 209 (168-262)                               | 1                       | ..      |
|                                | 1 visit               | 1790   | (27.6) | 14,296       | 21            | 147 (96-225)                                | 0.50 (0.31-0.83)        | ..      |
|                                | ≥2 visits             | 1349   | (20.8) | 7475         | 4             | 54 (20-143)                                 | 0.14 (0.05-0.39)        | ..      |
| Total                          | 6484                  | (55.3) | 58,534 | 102          | 174 (144-212) | ..                                          | ..                      |         |
| <b>Intermediate-risk group</b> | Whole risk group      | ..     | ..     | ..           | ..            | ..                                          | ..                      | 0.0016  |
|                                | 0 visits              | 3605   | (40.2) | 40,921       | 85            | 208 (168-257)                               | 1                       | ..      |
|                                | 1 visit               | 2565   | (28.6) | 24,087       | 41            | 170 (125-231)                               | 0.63 (0.43-0.93)        | ..      |
|                                | ≥2 visits             | 2797   | (31.2) | 15,565       | 24            | 154 (103-230)                               | 0.43 (0.26-0.71)        | ..      |
|                                | Total                 | 8967   | (100)  | 80,572       | 150           | 186 (159-218)                               | ..                      | ..      |
|                                | Lower-risk subgroup‡  | ..     | ..     | ..           | ..            | ..                                          | ..                      | 0.30    |
|                                | 0 visits              | 1932   | (40.8) | 23,237       | 33            | 142 (101-200)                               | 1                       | ..      |
|                                | 1 visit               | 1387   | (29.3) | 13,151       | 16            | 122 (75-199)                                | 0.66 (0.35-1.23)        | ..      |
|                                | ≥2 visits             | 1419   | (30.0) | 8082         | 13            | 161 (93-277)                                | 0.63 (0.31-1.29)        | ..      |
|                                | Total                 | 4738   | (52.8) | 44,470       | 62            | 139 (109-179)                               | ..                      | ..      |
|                                | Higher-risk subgroup‡ | ..     | ..     | ..           | ..            | ..                                          | ..                      | 0.0006  |
|                                | 0 visits              | 1673   | (39.6) | 17,684       | 52            | 294 (224-386)                               | 1                       | ..      |
|                                | 1 visit               | 1178   | (27.9) | 10,936       | 25            | 229 (154-338)                               | 0.58 (0.35-0.96)        | ..      |
|                                | ≥2 visits             | 1378   | (32.6) | 7482         | 11            | 147 (81-265)                                | 0.28 (0.14-0.56)        | ..      |
| Total                          | 4229                  | (47.2) | 36,102 | 88           | 244 (198-300) | ..                                          | ..                      |         |
| <b>High-risk group</b>         | Whole risk group      | ..     | ..     | ..           | ..            | ..                                          | ..                      | 0.0046  |
|                                | 0 visits              | 780    | (33.1) | 7847         | 33            | 421 (299-592)                               | 1                       | ..      |
|                                | 1 visit               | 623    | (26.5) | 6181         | 19            | 307 (196-482)                               | 0.51 (0.29-0.91)        | ..      |
|                                | ≥2 visits             | 951    | (40.4) | 5238         | 12            | 229 (130-403)                               | 0.33 (0.16-0.68)        | ..      |
|                                | Total                 | 2354   | (100)  | 19,266       | 64            | 332 (260-424)                               | ..                      | ..      |
|                                | Lower-risk subgroup§  | ..     | ..     | ..           | ..            | ..                                          | ..                      | 0.26    |
|                                | 0 visits              | 606    | (33.4) | 6226         | 17            | 273 (170-439)                               | 1                       | ..      |
|                                | 1 visit               | 474    | (26.1) | 4766         | 12            | 252 (143-443)                               | 0.66 (0.31-1.41)        | ..      |
|                                | ≥2 visits             | 737    | (40.6) | 4039         | 9             | 223 (116-428)                               | 0.49 (0.20-1.18)        | ..      |
|                                | Total                 | 1817   | (77.2) | 15,032       | 38            | 253 (184-347)                               | ..                      | ..      |
|                                | Higher-risk subgroup§ | ..     | ..     | ..           | ..            | ..                                          | ..                      | 0.0030  |
|                                | 0 visits              | 174    | (32.4) | 1620         | 16            | 987 (605-1612)                              | 1                       | ..      |
|                                | 1 visit               | 149    | (27.8) | 1414         | 7             | 495 (236-1038)                              | 0.34 (0.14-0.85)        | ..      |
|                                | ≥2 visits             | 214    | (39.9) | 1199         | 3             | 250 (81-776)                                | 0.15 (0.04-0.56)        | ..      |
| Total                          | 537                   | (22.8) | 4234   | 26           | 614 (418-902) | ..                                          | ..                      |         |

CI=confidence interval. CRC=colorectal cancer. HR=hazard ratio.

p-values calculated with the likelihood ratio test.

\*The number of surveillance visits was included as a time-varying covariate; patients who attended any surveillance contributed person-years to more than one category of number of surveillance visits.

†The higher-risk subgroup included patients with a tubulovillous or villous adenoma, or proximal polyps at baseline; the lower-risk subgroup included patients with none of these factors.

‡The higher-risk subgroup included patients with an adenoma with high-grade dysplasia, or proximal polyps at baseline; the lower-risk subgroup included patients with none of these factors.

§The higher-risk subgroup included patients with an adenoma with high-grade dysplasia at baseline; the lower-risk subgroup included patients with none of these factors.

**Supplementary Table 7: Cumulative colorectal cancer incidence and age- and sex-standardised incidence ratios, including only patients with a complete baseline colonoscopy**

|                                                                                           | n      | (% )  | Person<br>-years | CRC<br>cases | Incidence per<br>100,000 person-<br>years (95% CI) | Follow-up    |                              |              |                              |              |                              | Standardisation |                               |                  |    |
|-------------------------------------------------------------------------------------------|--------|-------|------------------|--------------|----------------------------------------------------|--------------|------------------------------|--------------|------------------------------|--------------|------------------------------|-----------------|-------------------------------|------------------|----|
|                                                                                           |        |       |                  |              |                                                    | 3 years      |                              | 5 years      |                              | 10 years     |                              | p-value         | Expected<br>CRCs <sup>†</sup> | SIR (95% CI)     |    |
|                                                                                           |        |       |                  |              |                                                    | CRC<br>cases | Cumulative<br>incidence (%)* | CRC<br>cases | Cumulative<br>incidence (%)* | CRC<br>cases | Cumulative<br>incidence (%)* |                 |                               |                  |    |
| <b>Low-risk group</b>                                                                     | ..     | ..    | ..               | ..           | ..                                                 | ..           | ..                           | ..           | ..                           | ..           | ..                           | ..              | ..                            | ..               | .. |
| After baseline (no surveillance, censored at first surveillance)                          | ..     | ..    | ..               | ..           | ..                                                 | ..           | ..                           | ..           | ..                           | ..           | ..                           | ..              | <0.0001                       | ..               | .. |
| Whole risk group                                                                          | 11,719 | (100) | 69,666           | 108          | 155 (128-187)                                      | 29           | 0.3% (0.2-0.4)               | 52           | 0.6% (0.5-0.8)               | 92           | 1.6% (1.3-2.1)               | ..              | 137                           | 0.79 (0.65-0.95) |    |
| Lower-risk subgroup‡                                                                      | 5235   | (45)  | 32,903           | 31           | 94 (66-134)                                        | 6            | 0.1% (0.1-0.3)               | 11           | 0.3% (0.2-0.5)               | 29           | 1.2% (0.8-1.7)               | ..              | 60                            | 0.51 (0.35-0.73) |    |
| Higher-risk subgroup‡                                                                     | 6484   | (55)  | 36,763           | 77           | 209 (168-262)                                      | 23           | 0.4% (0.3-0.7)               | 41           | 0.9% (0.7-1.2)               | 63           | 2.1% (1.6-2.7)               | ..              | 77                            | 1.00 (0.79-1.26) |    |
| After first surveillance (one surveillance visit, censored at second surveillance)        | ..     | ..    | ..               | ..           | ..                                                 | ..           | ..                           | ..           | ..                           | ..           | ..                           | ..              | 0.066                         | ..               | .. |
| Whole risk group                                                                          | 5570   | (100) | 25,706           | 29           | 113 (78-162)                                       | 12           | 0.3% (0.2-0.5)               | 20           | 0.5% (0.3-0.8)               | 28           | 1.4% (0.8-2.4)               | ..              | 51                            | 0.57 (0.38-0.82) |    |
| Lower-risk subgroup‡                                                                      | 2431   | (44)  | 11,410           | 8            | 70 (35-140)                                        | 5            | 0.2% (0.1-0.6)               | 7            | 0.4% (0.2-0.8)               | 8            | 0.6% (0.2-1.4)               | ..              | 21                            | 0.38 (0.16-0.74) |    |
| Higher-risk subgroup‡                                                                     | 3139   | (56)  | 14,296           | 21           | 147 (96-225)                                       | 7            | 0.3% (0.1-0.6)               | 13           | 0.6% (0.4-1.1)               | 20           | 2.1% (1.1-3.9)               | ..              | 30                            | 0.70 (0.44-1.08) |    |
| After second surveillance (two or more surveillance visits, censored at end of follow-up) | ..     | ..    | ..               | ..           | ..                                                 | ..           | ..                           | ..           | ..                           | ..           | ..                           | ..              | 0.97                          | ..               | .. |
| Whole risk group                                                                          | 2348   | (100) | 12,948           | 7            | 54 (26-113)                                        | 0            | -                            | 1            | 0.1% (0.0-0.6)               | 5            | 0.8% (0.3-1.9)               | ..              | 27                            | 0.26 (0.10-0.53) |    |
| Lower-risk subgroup‡                                                                      | 999    | (43)  | 5472             | 3            | 55 (18-170)                                        | 0            | -                            | 0            | -                            | 2            | 0.7% (0.2-3.0)               | ..              | 10                            | 0.29 (0.06-0.84) |    |
| Higher-risk subgroup‡                                                                     | 1349   | (57)  | 7475             | 4            | 54 (20-143)                                        | 0            | -                            | 1            | 0.2% (0.0-1.1)               | 3            | 0.8% (0.2-2.6)               | ..              | 17                            | 0.24 (0.07-0.62) |    |
| <b>Intermediate-risk group</b>                                                            | ..     | ..    | ..               | ..           | ..                                                 | ..           | ..                           | ..           | ..                           | ..           | ..                           | ..              | ..                            | ..               | .. |
| After baseline (no surveillance, censored at first surveillance)                          | ..     | ..    | ..               | ..           | ..                                                 | ..           | ..                           | ..           | ..                           | ..           | ..                           | ..              | 0.0004                        | ..               | .. |
| Whole risk group                                                                          | 8967   | (100) | 40,921           | 85           | 208 (168-257)                                      | 35           | 0.5% (0.4-0.7)               | 55           | 1.1% (0.8-1.4)               | 74           | 2.1% (1.6-2.7)               | ..              | 88                            | 0.97 (0.77-1.19) |    |
| Lower-risk subgroup§                                                                      | 4738   | (53)  | 23,237           | 33           | 142 (101-200)                                      | 13           | 0.4% (0.2-0.6)               | 20           | 0.7% (0.4-1.1)               | 27           | 1.3% (0.8-2.1)               | ..              | 47                            | 0.70 (0.48-0.99) |    |
| Higher-risk subgroup§                                                                     | 4229   | (47)  | 17,684           | 52           | 294 (224-386)                                      | 22           | 0.7% (0.5-1.1)               | 35           | 1.5% (1.1-2.2)               | 47           | 3.1% (2.2-4.4)               | ..              | 41                            | 1.27 (0.95-1.66) |    |
| After first surveillance (one surveillance visit, censored at second surveillance)        | ..     | ..    | ..               | ..           | ..                                                 | ..           | ..                           | ..           | ..                           | ..           | ..                           | ..              | 0.028                         | ..               | .. |
| Whole risk group                                                                          | 5362   | (100) | 24,087           | 41           | 170 (125-231)                                      | 10           | 0.2% (0.1-0.4)               | 22           | 0.8% (0.5-1.2)               | 39           | 2.9% (2.0-4.3)               | ..              | 53                            | 0.77 (0.55-1.05) |    |
| Lower-risk subgroup§                                                                      | 2806   | (52)  | 13,151           | 16           | 122 (75-199)                                       | 3            | 0.1% (0.0-0.4)               | 8            | 0.5% (0.2-1.0)               | 15           | 1.9% (1.0-3.4)               | ..              | 27                            | 0.59 (0.34-0.96) |    |

|                                                                                                    |      |       |        |    |     |            |    |                |    |                 |    |                  |         |    |      |             |
|----------------------------------------------------------------------------------------------------|------|-------|--------|----|-----|------------|----|----------------|----|-----------------|----|------------------|---------|----|------|-------------|
| Higher-risk subgroup§                                                                              | 2556 | (48)  | 10,936 | 25 | 229 | (154-338)  | 7  | 0.4% (0.2-0.7) | 14 | 1.1% (0.6-1.8)  | 24 | 4.3% (2.6-7.3)   | ..      | 26 | 0.96 | (0.62-1.42) |
| After second surveillance<br>(two or more surveillance<br>visits, censored at end of<br>follow-up) | ..   | ..    | ..     | .. | ..  | ..         | .. | ..             | .. | ..              | .. | ..               | 0.99    | .. | ..   | ..          |
| Whole risk group                                                                                   | 2797 | (100) | 15,565 | 24 | 154 | (103-230)  | 6  | 0.3% (0.1-0.6) | 10 | 0.5% (0.3-1.0)  | 18 | 1.7% (1.0-2.8)   | ..      | 36 | 0.66 | (0.42-0.98) |
| Lower-risk subgroup§                                                                               | 1419 | (51)  | 8082   | 13 | 161 | (93-277)   | 3  | 0.3% (0.1-0.8) | 6  | 0.6% (0.3-1.5)  | 10 | 1.7% (0.8-3.3)   | ..      | 18 | 0.72 | (0.38-1.22) |
| Higher-risk subgroup§                                                                              | 1378 | (49)  | 7482   | 11 | 147 | (81-265)   | 3  | 0.3% (0.1-0.8) | 4  | 0.4% (0.1-1.0)  | 8  | 1.7% (0.8-3.7)   | ..      | 18 | 0.61 | (0.30-1.09) |
| <b>High-risk group</b>                                                                             | ..   | ..    | ..     | .. | ..  | ..         | .. | ..             | .. | ..              | .. | ..               | ..      | .. | ..   | ..          |
| After baseline (no<br>surveillance, censored at<br>first surveillance)                             | ..   | ..    | ..     | .. | ..  | ..         | .. | ..             | .. | ..              | .. | ..               | <0.0001 | .. | ..   | ..          |
| Whole risk group                                                                                   | 2354 | (100) | 7847   | 33 | 421 | (299-592)  | 13 | 0.9% (0.5-1.6) | 23 | 2.6% (1.7-4.0)  | 32 | 5.8% (3.8-8.9)   | ..      | 20 | 1.68 | (1.15-2.35) |
| Lower-risk subgroup¶                                                                               | 1817 | (77)  | 6226   | 17 | 273 | (170-439)  | 7  | 0.6% (0.3-1.4) | 13 | 1.9% (1.0-3.4)  | 17 | 3.8% (2.1-6.8)   | ..      | 15 | 1.10 | (0.64-1.76) |
| Higher-risk subgroup¶                                                                              | 537  | (23)  | 1620   | 16 | 987 | (605-1612) | 6  | 2.1% (0.9-4.8) | 10 | 5.4% (2.7-10.4) | 15 | 14.4% (7.8-25.7) | ..      | 4  | 3.76 | (2.15-6.11) |
| After first surveillance<br>(one surveillance visit,<br>censored at second<br>surveillance)        | ..   | ..    | ..     | .. | ..  | ..         | .. | ..             | .. | ..              | .. | ..               | 0.12    | .. | ..   | ..          |
| Whole risk group                                                                                   | 1574 | (100) | 6181   | 19 | 307 | (196-482)  | 8  | 0.6% (0.3-1.3) | 15 | 2.0% (1.2-3.5)  | 18 | 4.4% (2.1-8.9)   | ..      | 16 | 1.21 | (0.73-1.89) |
| Lower-risk subgroup¶                                                                               | 1211 | (77)  | 4766   | 12 | 252 | (143-443)  | 5  | 0.5% (0.2-1.3) | 8  | 1.3% (0.6-2.9)  | 11 | 4.4% (1.8-10.6)  | ..      | 12 | 1.01 | (0.52-1.76) |
| Higher-risk subgroup¶                                                                              | 363  | (23)  | 1414   | 7  | 495 | (236-1038) | 3  | 1.1% (0.3-3.2) | 7  | 4.5% (2.0-9.7)  | 7  | 4.5% (2.0-9.7)   | ..      | 4  | 1.82 | (0.73-3.75) |
| After second surveillance<br>(two or more surveillance<br>visits, censored at end of<br>follow-up) | ..   | ..    | ..     | .. | ..  | ..         | .. | ..             | .. | ..              | .. | ..               | 0.91    | .. | ..   | ..          |
| Whole risk group                                                                                   | 951  | (100) | 5238   | 12 | 229 | (130-403)  | 2  | 0.3% (0.1-1.0) | 7  | 1.1% (0.5-2.3)  | 12 | 2.8% (1.5-5.2)   | ..      | 14 | 0.85 | (0.44-1.48) |
| Lower-risk subgroup¶                                                                               | 737  | (77)  | 4039   | 9  | 223 | (116-428)  | 1  | 0.2% (0.0-1.2) | 6  | 1.3% (0.6-2.8)  | 9  | 2.4% (1.2-4.7)   | ..      | 11 | 0.83 | (0.38-1.58) |
| Higher-risk subgroup¶                                                                              | 214  | (23)  | 1199   | 3  | 250 | (81-776)   | 1  | 0.5% (0.1-3.6) | 1  | 0.5% (0.1-3.6)  | 3  | 3.7% (1.0-13.2)  | ..      | 3  | 0.88 | (0.18-2.58) |

CI=confidence interval. CRC=colorectal cancer. SIR=standardised incidence ratio.

p-values calculated with the log-rank test to compare incidence in the lower-risk and higher-risk subgroups of each risk group.

\*One minus the Kaplan-Meier estimator of the survival function was used to estimate the cumulative incidence of colorectal cancer.

†Expected numbers of colorectal cancers were calculated by multiplying the sex and five-year age-group-specific observed person-years by the corresponding incidence rates in the general population of England in 2007.

‡The higher-risk subgroup included patients with a tubulovillous or villous adenoma, or proximal polyps at baseline; the lower-risk subgroup included patients with none of these factors.

§The higher-risk subgroup included patients with an adenoma with high-grade dysplasia, or proximal polyps at baseline; the lower-risk subgroup included patients with none of these factors.

¶The higher-risk subgroup included patients with an adenoma with high-grade dysplasia at baseline; the lower-risk subgroup included patients with none of these factors.
